# Supplementary material
Source: PubMed Central journal article supplement (PMC6035881)
Supplement: NIHMS974102-supplement-2.pdf [file NIHMS974102-supplement-2.pdf]

**Supplemental Table 1. Summary of survival outcomes in the galidesivir IM treatment (efficacy experiment 1).**

| <b>Compound</b> | <b>Day 0 Loading Dose, BID (mg/kg/day)</b> | <b>Dose (mg/kg/day)</b> | <b>Treatment Regimen</b>                       | <b>Survivors/Total<sup>a</sup></b> | <b>Median Survivals<sup>b</sup></b> |
|-----------------|--------------------------------------------|-------------------------|------------------------------------------------|------------------------------------|-------------------------------------|
| Galidesivir     | 1000                                       | 250                     |                                                | 0/10                               | 3.5                                 |
| Galidesivir     | 800                                        | 200                     | Loading dose 30 min pre-infection, BID, 6 days | 1/10                               | 4                                   |
| Galidesivir     | 600                                        | 150                     |                                                | 2/10                               | 11                                  |
| Galidesivir     | 400                                        | 100                     |                                                | 5/10*                              | 17.5                                |
| Placebo         |                                            | 0.1 ml PBS              |                                                | 0/10                               | 3                                   |
| Ribavirin       |                                            | 100                     | 30 min pre-infection, BID, 8 days              | 4/10                               | 13.5                                |

<sup>a</sup>Survival totals compared by the two-tailed Fisher's exact test.

<sup>b</sup>Median survivals expressed as the number of days when 50% of the animals survived.

\*  $P < 0.05$  compared to placebo-treated hamsters.

**Supplemental Table 2. Serum biochemistry parameters on day 2 p.i. with RVFV in hamsters treated with galidesivir (efficacy experiment 1).**

|                        | Galidesivir Loading / Dose (BID) |                     |                     |                     | Placebo       | Normal Controls |
|------------------------|----------------------------------|---------------------|---------------------|---------------------|---------------|-----------------|
|                        | 1000 / 250 mg/kg/day             | 800 / 200 mg/kg/day | 600 / 150 mg/kg/day | 400 / 100 mg/kg/day |               |                 |
| <b>Blood chemistry</b> |                                  |                     |                     |                     |               |                 |
| TP mg/dL               | 3.7 ± 1.0**                      | 3.2 ± 0.2***        | 4.4 ± 0.8*          | 4.7 ± 0.2*          | 5.9 ± 0.0     | 6.7 ± 0.9       |
| ALB g/dL               | 1.9 ± 0.5**                      | 1.6 ± 0.1***        | 2.2 ± 0.3**         | 2.4 ± 0.2*          | 2.8 ± 0.1     | 3.8 ± 0.9       |
| BUN mg/dL              | 15.2 ± 59.6                      | 19.9 ± 3.1          | 13.7 ± 2.3          | 18.8 ± 2.0          | 27.9 ± 13.9   | 27.8 ± 0.6      |
| CRE mg/dL              | 0.7 ± 0.8                        | 0.3 ± 0.1           | 0.2 ± 0.1           | 0.2 ± 0.0           | 0.4 ± 0.3     | 0.3 ± 0.1       |
| Ca mg/dL               | 10.5 ± 1.0                       | 10.7 ± 0.5          | 10.7 ± 0.6          | 11.4 ± 0.3          | 9.9 ± 2.8     | 11.5 ± 0.8      |
| PHOS mg/dL             | 9.9 ± 4.4                        | 7.9 ± 0.2           | 7.3 ± 1.0           | 7.5 ± 0.2           | 10.5 ± 3.8    | 8.3 ± 0.5       |
| AST U/L                | 609.3 ± 375.1                    | 569 ± 33.8          | 203.7 ± 43.1        | 370.7 ± 81.4        | 599.5 ± 566.4 | 307.5 ± 242.5   |
| ALP U/L                | 304 ± 145.4                      | 297.7 ± 24.2        | 172 ± 23.4          | 136.7 ± 14.6        | 600 ± 555.8   | 169 ± 4.2       |
| ALT U/L                | 552.3 ± 433.3                    | 931 ± 67.1          | 185.7 ± 65.8        | 185 ± 56.5          | 619 ± 538.8   | 428 ± 418.6     |
| GGT U/L                | 10 ± 0.0                         | 10 ± 0.0            | 10 ± 0.0            | 10 ± 0.0            | 10 ± 0.0      | 36.5 ± 37.5     |
| GLU mg/dL              | 153.3 ± 126.2                    | 77.7 ± 18.7         | 155.3 ± 64.0        | 148.3 ± 99.7        | 87.5 ± 75.7   | 137 ± 18.4      |
| TBIL mg/dl             | 0.8 ± 0.8                        | 2.5 ± 1.2           | 0.3 ± 0.2           | 0.4 ± 0.1           | 0.3 ± 0.1     | 1.7 ± 2.0       |

A comprehensive 12-parameter metabolic blood chemistry analysis was performed on day 2 post-infection (p.i.) serum samples to evaluate liver and kidney function. Tests within the comprehensive panel include: total protein (TP), albumin (ALB), blood urea nitrogen (BUN), creatinine (CREA), calcium (Ca), phosphate (PHOS), aspartate aminotransferase (AST), alkaline phosphatase (ALP), alanine aminotransferase (ALT), gamma-glutamyl transferase (GGT), glucose (GLU), and total bilirubin (TBIL). Chemistry tests were performed per the manufacturer's recommendations using the DRI-CHEM 4000 (Heska, Des Moines, IA). Data are reported as the group mean and standard deviation. \* $P < 0.05$ , \*\* $P < 0.01$ , \*\*\* $P < 0.001$  compared to the normal controls.

**Supplemental Table 3. Summary of survival outcomes in the galidesivir IP treatment (efficacy experiment 2).**

| Compound    | Day 0 Loading Dose, BID (mg/kg/day) | Dose (mg/kg/day) | Treatment Regimen | Survivors/ Total <sup>a</sup> | Median Survivals <sup>b</sup> |
|-------------|-------------------------------------|------------------|-------------------|-------------------------------|-------------------------------|
| Galidesivir | 400                                 | 100              | BID x 6 days      | 7/10**                        | undefined                     |
| Galidesivir | 240                                 | 60               | BID x 6 days      | 4/10                          | 10.5                          |
| Galidesivir |                                     | 120              | BID x 7 days      | 3/10                          | 9                             |
| Galidesivir | 200                                 | 100              | QD x 6 days       | 3/10                          | 11.5                          |
| Ribavirin   |                                     | 100              | BID x 7 days      | 3/10                          | 16.5                          |
| Placebo     |                                     | 0.1 ml LRS       | BID x 7 days      | 0/10                          | 3                             |

<sup>a</sup>Survival totals compared by the two-tailed Fisher's exact test.

<sup>b</sup>Median survivals expressed as the number of days when 50% of the animals survived.

\*\*  $P < 0.01$  compared to placebo-treated hamsters.
